# Supplementary material
Source: PubMed Central journal article supplement (PMC2518179)

**Appendix 1:** Distribution of cancer events by low-density lipoprotein cholesterol levels, at intervals of 0.25 mmol/L.

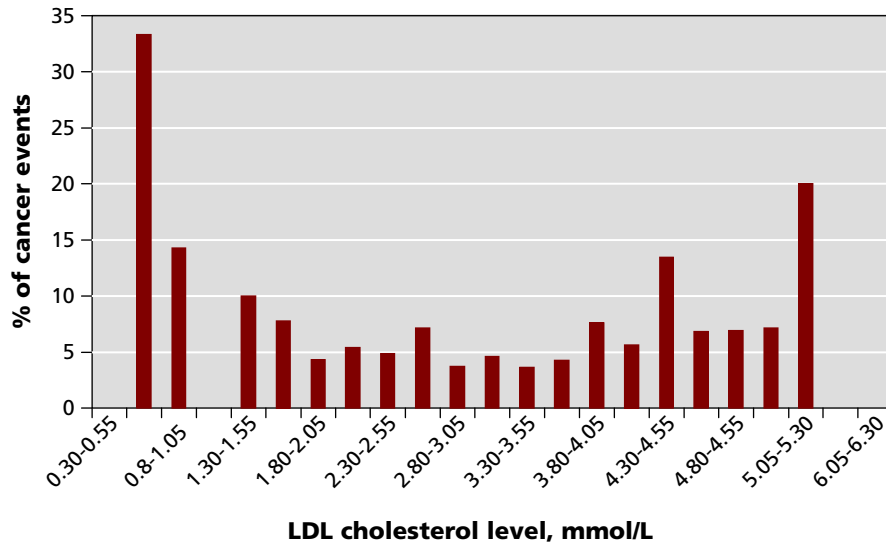

Supplement: supp_179_5_427__1.pdf [file supp_179_5_427__1.pdf]
